# Supplementary material
Source: PubMed Central journal article supplement (PMC5695864)
Supplement: NIHMS920374-supplement-supporting_information.pdf [file NIHMS920374-supplement-supporting_information.pdf]

# Supporting Information

## **Designer $\alpha$ 1,6-Fucosidase Mutants Enable Direct Core Fucosylation of Intact N-Glycopeptides and N-Glycoproteins**

*Chao Li, Shilei Zhu, Christopher Ma, Lai-Xi Wang\**

Department of Chemistry and Biochemistry, University of Maryland, 8051 Regents Drive,  
College Park, Maryland 20742, USA

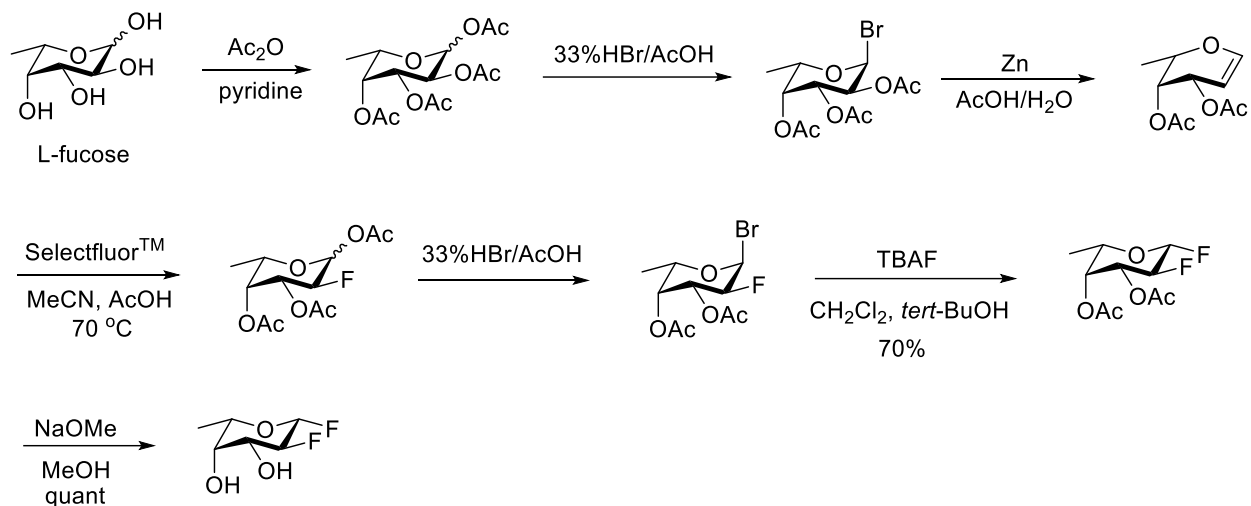

**Scheme S1.** Synthesis of 2-deoxy-2-fluoro- $\beta$ -L-fucopyranosyl fluoride (**2**).

Characterization of **2**: <sup>1</sup>H NMR (D<sub>2</sub>O, 400 MHz):  $\delta$  = 5.10 (m, 1H, H-1), 4.41 (m, 1H, H-2), 3.66 (m, 3H, H-5, H-4, H-3), 1.32 (d, 3H, -CH<sub>3</sub>). <sup>13</sup>C NMR (D<sub>2</sub>O, 100 MHz):  $\delta$  = 107.53 (C-1), 91.47 (C-2), 71.76 (C-4), 71.57 (C-5), 71.32 (C-3), 15.78 (-CH<sub>3</sub>). ESI-MS: calc. for **2**, M = 168.1 Da, found (m/z), 169.1 [M + H]<sup>+</sup>, 191.1 [M + Na]<sup>+</sup>; HR-MS: [M + Na]<sup>+</sup> calc. for C<sub>6</sub>H<sub>10</sub>O<sub>3</sub>F<sub>2</sub>Na, 191.0924, found (m/z), 191.0948.

**Table S1.** Complementary primer pair of each AlfC mutant. The underline indicates the mutation site for each mutant.

| AlfC mutants | Primer pair                                                                                               |
|--------------|-----------------------------------------------------------------------------------------------------------|
| D200A        | Fw: CGCGACCGCCTGGTTC <u>GCC</u> GTGCCGATGACGCTGT<br>Rv: ACAGCGTCATCGGCAC <u>GCG</u> GAACCAGGCGGTCGCG      |
| D200S        | Fw: CGCGACCGCCTGGTTC <u>TCC</u> GTGCCGATGACGCTGT<br>Rv: ACAGCGTCATCGGCAC <u>GGA</u> GAACCAGGCGGTCGCG      |
| D200G        | Fw: CGCGACCGCCTGGTTC <u>GGC</u> GTGCCGATGACGCTGT<br>Rv: ACAGCGTCATCGGCAC <u>GCC</u> GAACCAGGCGGTCGCG      |
| D200T        | Fw: CGCGACCGCCTGGTTC <u>ACC</u> GTGCCGATGACGCTGT<br>Rv: ACAGCGTCATCGGCAC <u>GGT</u> GGAACCAGGCGGTCGCG     |
| E274A        | Fw: CACCGCTGGGTCTGTAC <u>GCA</u> ACCGCGGGCACGATTAA<br>Rv: TTAATCGTGCCCGCGGT <u>TGC</u> GTACAGACCCAGCGGTG  |
| E274S        | Fw: CACCGCTGGGTCTGTACT <u>TCA</u> ACCGCGGGCACGATTAA<br>Rv: TTAATCGTGCCCGCGGT <u>TGA</u> GTACAGACCCAGCGGTG |
| E274G        | Fw: CACCGCTGGGTCTGTAC <u>GGA</u> ACCGCGGGCACGATTAA<br>Rv: TTAATCGTGCCCGCGGT <u>TCC</u> GTACAGACCCAGCGGTG  |
| E274D        | Fw: CCGCTGGGTCTGTAC <u>GATA</u> ACCGCGGGCACG<br>Rv: CGTGCCCGCGGT <u>ATC</u> GTACAGACCCAGCGG               |

**Table S2.** Transglycosylation kinetics of AlfC  $\alpha$ -fucosidase mutants. <sup>a)</sup>

| Enzyme                   | $k_{\text{cat}}$ ( $\text{min}^{-1}$ ) | $K_{\text{M}}$ (mM) | $k_{\text{cat}}/K_{\text{M}}$ ( $\text{min}^{-1}\text{mM}^{-1}$ ) |
|--------------------------|----------------------------------------|---------------------|-------------------------------------------------------------------|
| E274G (a/b) <sup>b</sup> | $1.38 \pm 0.15 \times 10^2$            | $0.25 \pm 0.03$     | $5.52 \pm 0.41 \times 10^2$                                       |
| E274A (a/b) <sup>b</sup> | $2.73 \pm 0.18 \times 10^2$            | $0.17 \pm 0.02$     | $16.1 \pm 0.89 \times 10^2$                                       |
| E274S (a/b) <sup>b</sup> | $2.42 \pm 0.14 \times 10^2$            | $0.26 \pm 0.03$     | $9.31 \pm 0.56 \times 10^2$                                       |

<sup>a</sup> Conditions: Donor sugar (0.2 to 2.0 mM), acceptor (2.0 mM), sodium phosphate (0.1 M, pH 7.5), 42 °C.

A

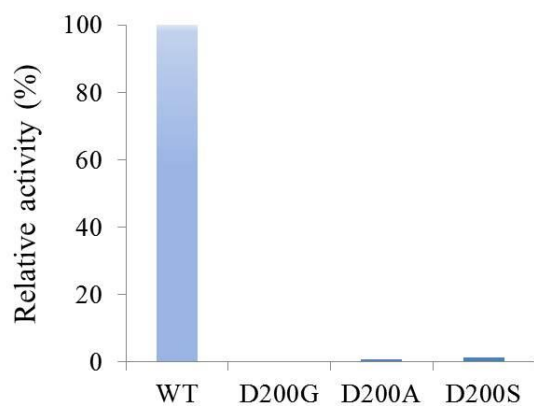

B

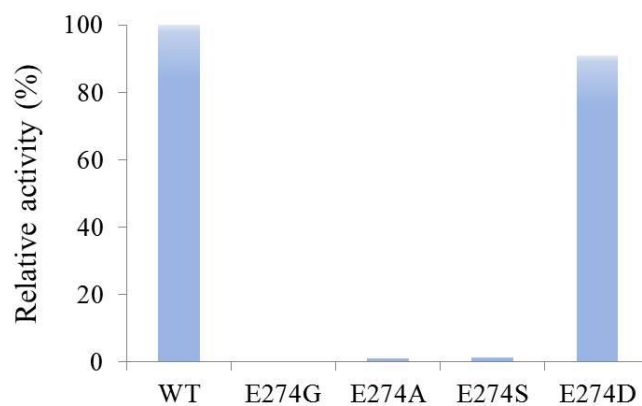

**Figure S1.** Comparison of the hydrolytic activity of wild-type AlfC  $\alpha$ -fucosidase and its mutants.

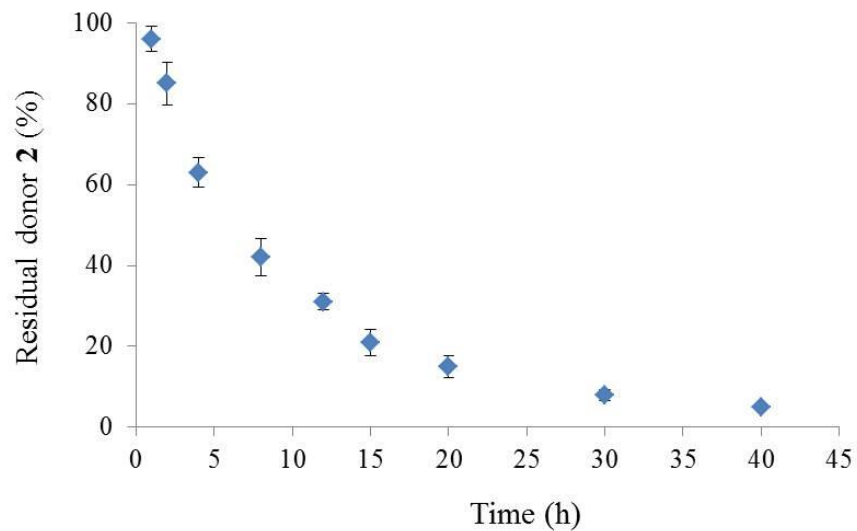

Figure S2. Time course of the hydrolysis of 2-deoxy-2-fluoro- $\beta$ -fucosyl fluoride (**2**) in a phosphate buffer. The experiments were performed in a phosphate buffer (100 mM, pH 7.4) at 37 °C. The amount of residual **2** was determined by HPAEC-PAD analysis on a Dionex chromatography system.

A

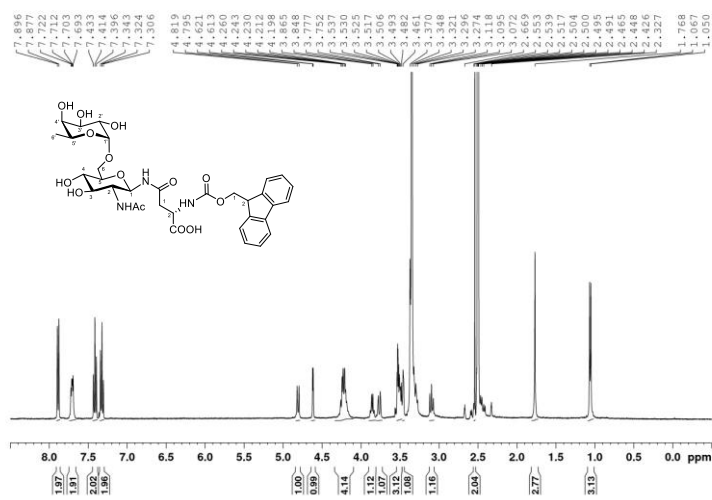

B

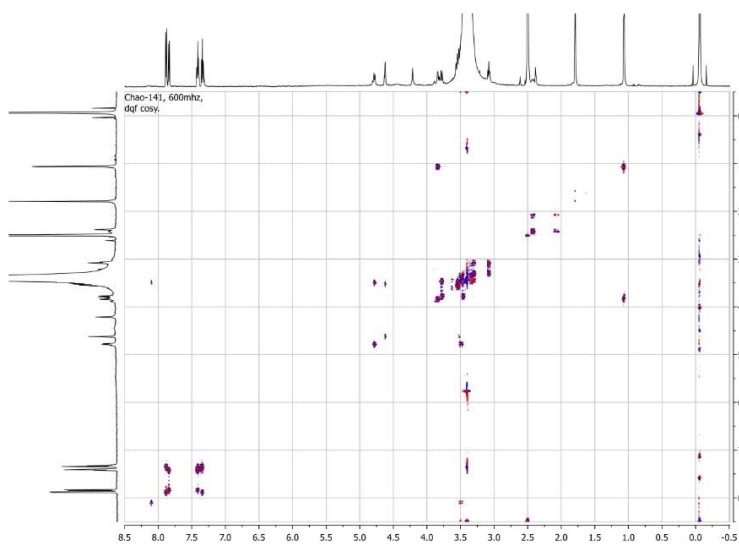

**Figure S3.**  $^1\text{H}$  NMR spectrum of the fucosylated product (**5**). A)  $^1\text{H}$ -NMR; B)  $^1\text{H}$ - $^1\text{H}$  COSY spectrum.

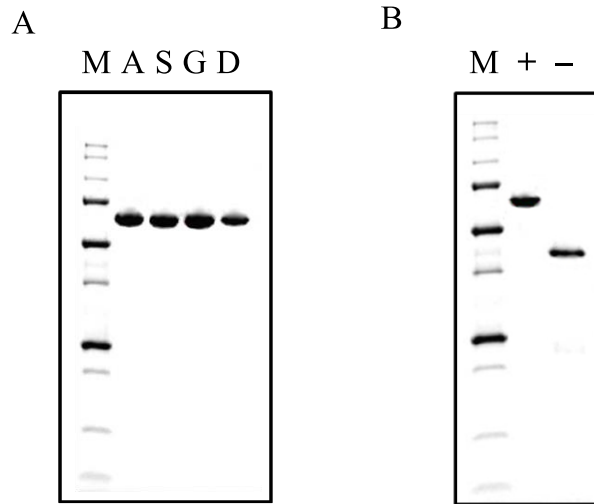

**Figure S4.** SDS-PAGE of AlfC  $\alpha$ -1,6-fucosidase mutants. A) lane M, protein ladder; lane A, mutant E274A; lane S, mutant E274S; lane G, mutant E274G and lane D, mutant E274D. B) lane +, AlfC mutant E274A with CPD tag; lane -, AlfC mutant E274A without CPD tag.



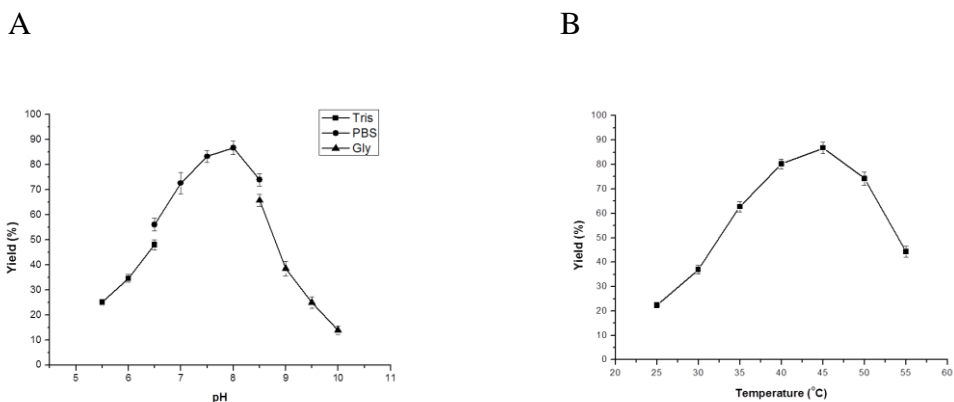

**Figure S5.** Catalytic profiles of AlfC E274A under different conditions. A) pH profile; B) temperature profile of its catalysis. To investigate pH profile of AlfC  $\alpha$ -fucosidase in transglycosylation reaction, a mixture of the donor sugar (**3**) (20 mM), acceptor sugar (**4**) (10 mM) and enzyme AlfC E274A (0.2 mg/mL) was incubated in the respective buffer at 42 °C for 20 min, including Tris-HCl (0.1 M, pH5.5-6.5), PBS (0.1 M, pH6.5-8.5) and glycine-NaOH (0.1 M, pH8.5-10.0), all contains 5% DMSO. The transglycosylation product was quantitated by HPLC analysis. To investigate temperature profile of AlfC  $\alpha$ -fucosidase in transglycosylation reaction, a mixture of donor sugar **3** (20 mM), acceptor sugar (**4**) (10 mM) and enzyme AlfC E274G (0.2 mg/mL) was incubated in a PBS buffer (0.1 M, pH7.5) containing 5% DMSO. The reactions were carried out for 20 min at various temperatures, including 25 °C, 30 °C, 35 °C, 40 °C, 45 °C, 50 °C and 55 °C. The transglycosylation product was quantitated by HPLC analysis.

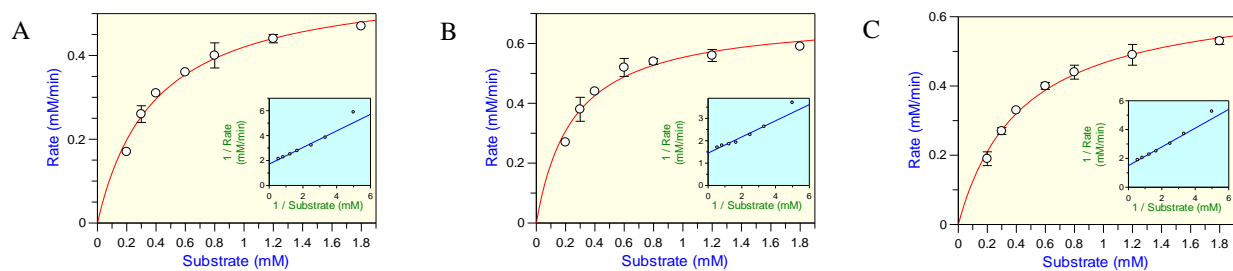

**Figure S6.** Michaelis-Menten plots for transglycosylation kinetics of AlfC mutant E274G (A), E274A (B) and E274S (C).

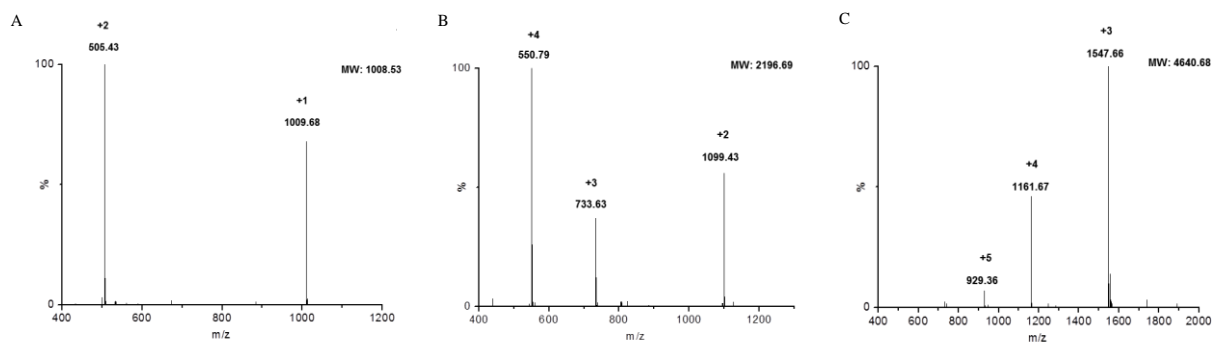

**Figure S7.** ESI-MS spectra of fucosylated peptides. Products **7** (A), **9** (B) and **11** (C).

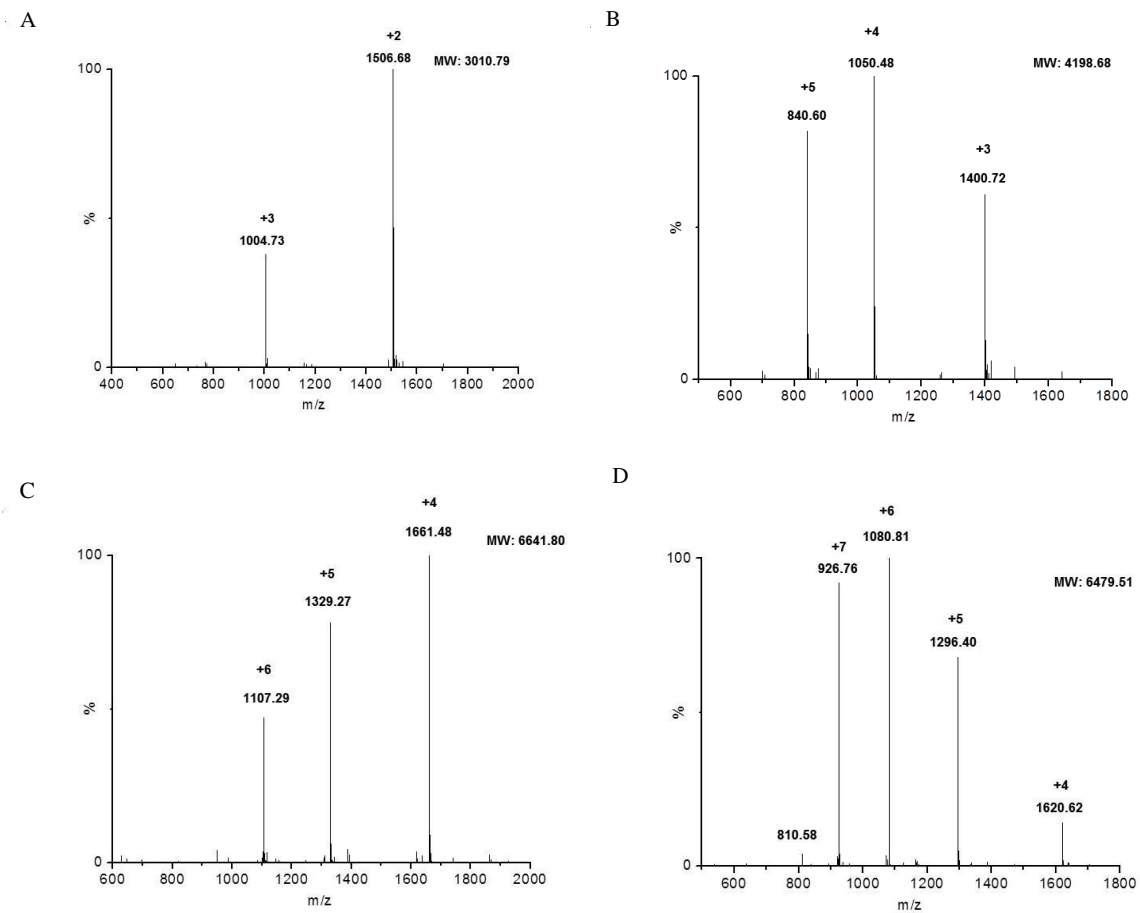

**Figure S8.** ESI-MS spectra of core fucosylated glycopeptides. Products **13** (A), **15** (B), **17** (C) **19** (D).

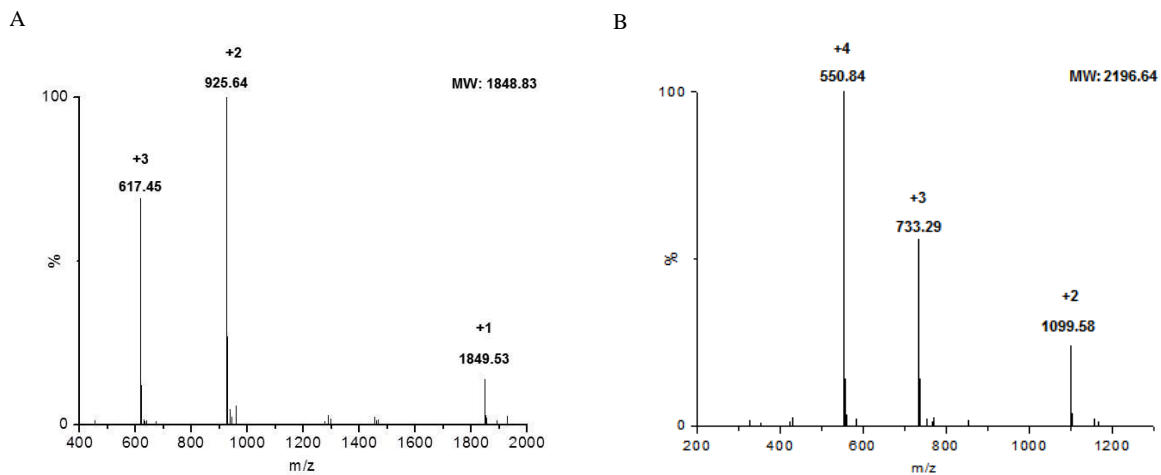

**Figure S9.** Characterization of **15** by enzymatic transformation coupled with ESI-MS analysis. A) the ESI-MS of the product from the PNGase F treatment of **15**; B) the ESI-MS of the product from the Endo-F3 treatment of **15**.

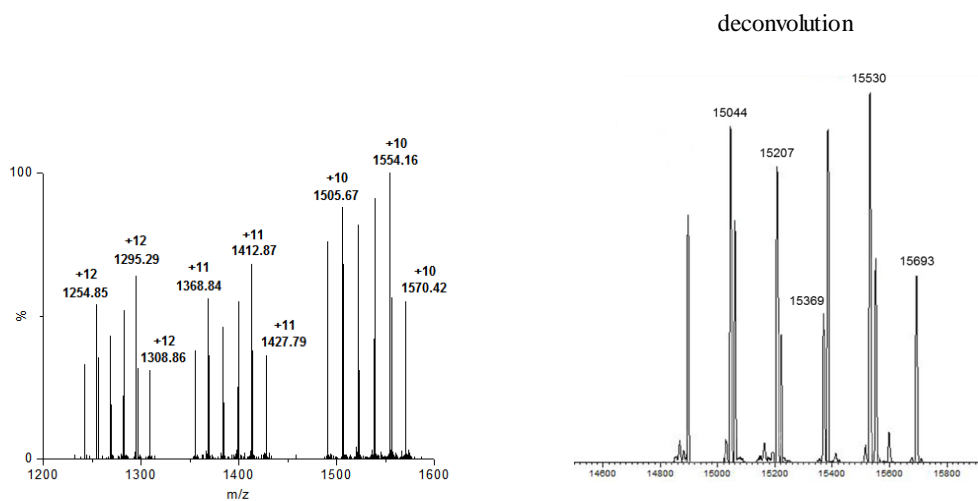

**Figure S10.** Characterization of mixture of the product (**21**) and the substrate (**20**). ESI-MS spectrum of the mixture and the corresponding deconvolution.

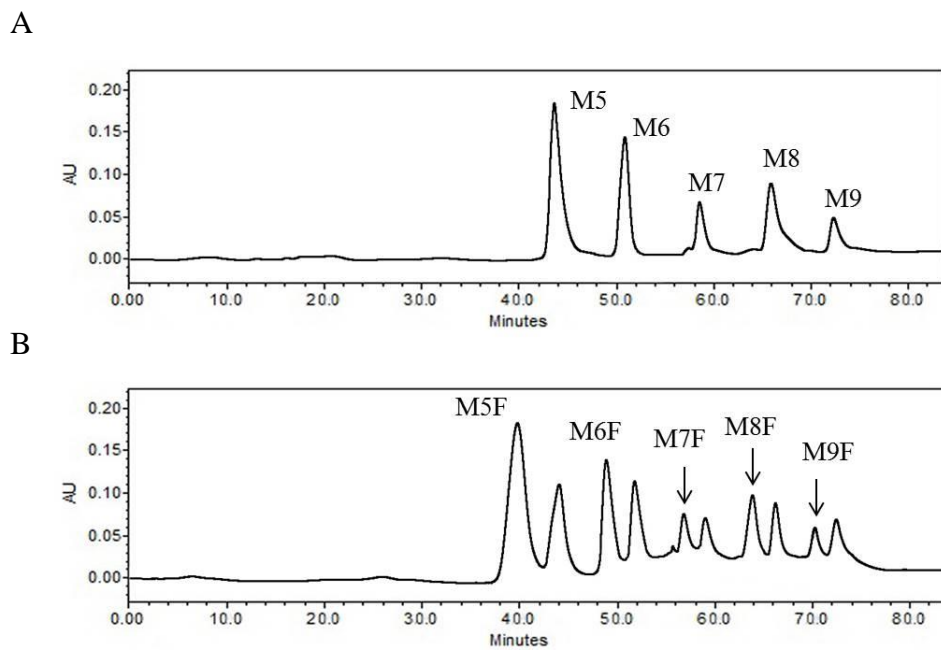

**Figure S11.** HPLC chromatography of Fmoc-labeling glycans of RNase B. A) Fmoc tagged N-Glycans from RNase B **20**. B) Fmoc tagged N-Glycans from the transglycosylation mixtures containing the starting glycoprotein (**20**) and the fucosylated RNase B (**21**).

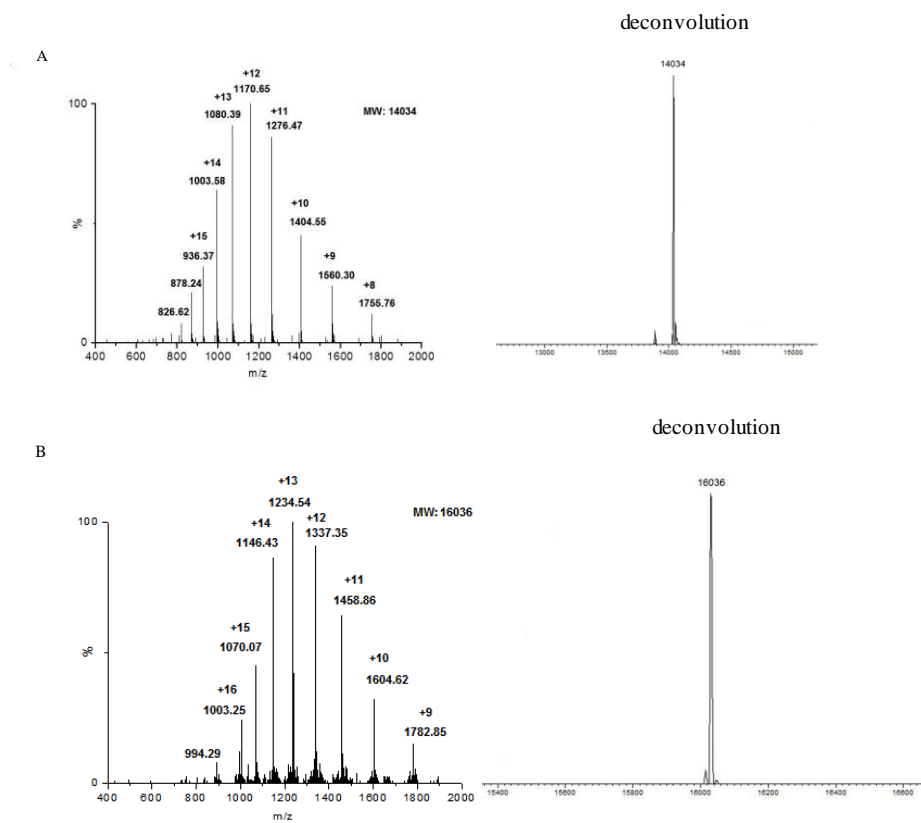

**Figure S12.** Characterization of RNase derivatives (**23** and **25**). A) ESI-MS of the Fuc $\alpha$ 1,6GlcNAc-RNase (**23**); B) ESI-MS of the core-fucosylated complex type RNase C (**25**)



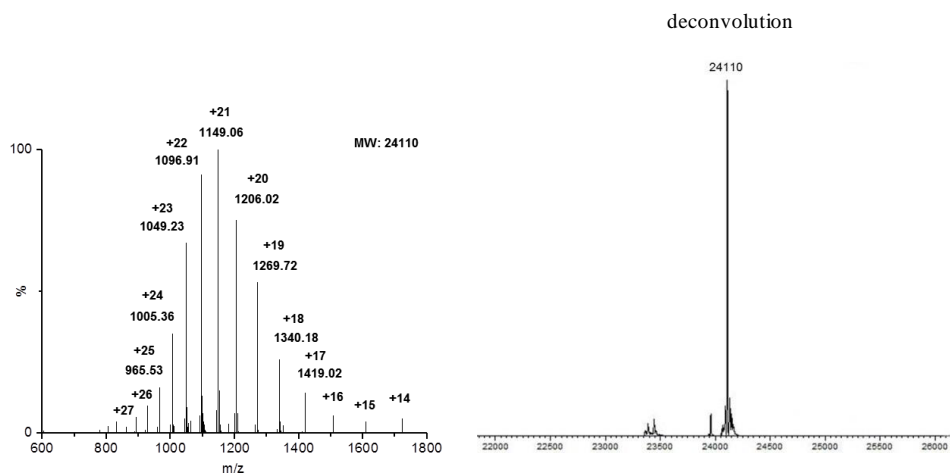

**Figure S13.** The ESI-MS of the Fc domain from the IdeS treatment of **29** and the corresponding deconvolution.
